# Supplementary material for: Superhelical Architecture of the Myosin Filament-Linking Protein Myomesin with Unusual Elastic Properties
Source: PLOS journal article supplement (doi:10.1371/journal.pbio.1001261), 2012-02-14
Supplement: S4 (10.1371/journal.pbio.1001261.s004) [file journal.pbio.1001261.s004]

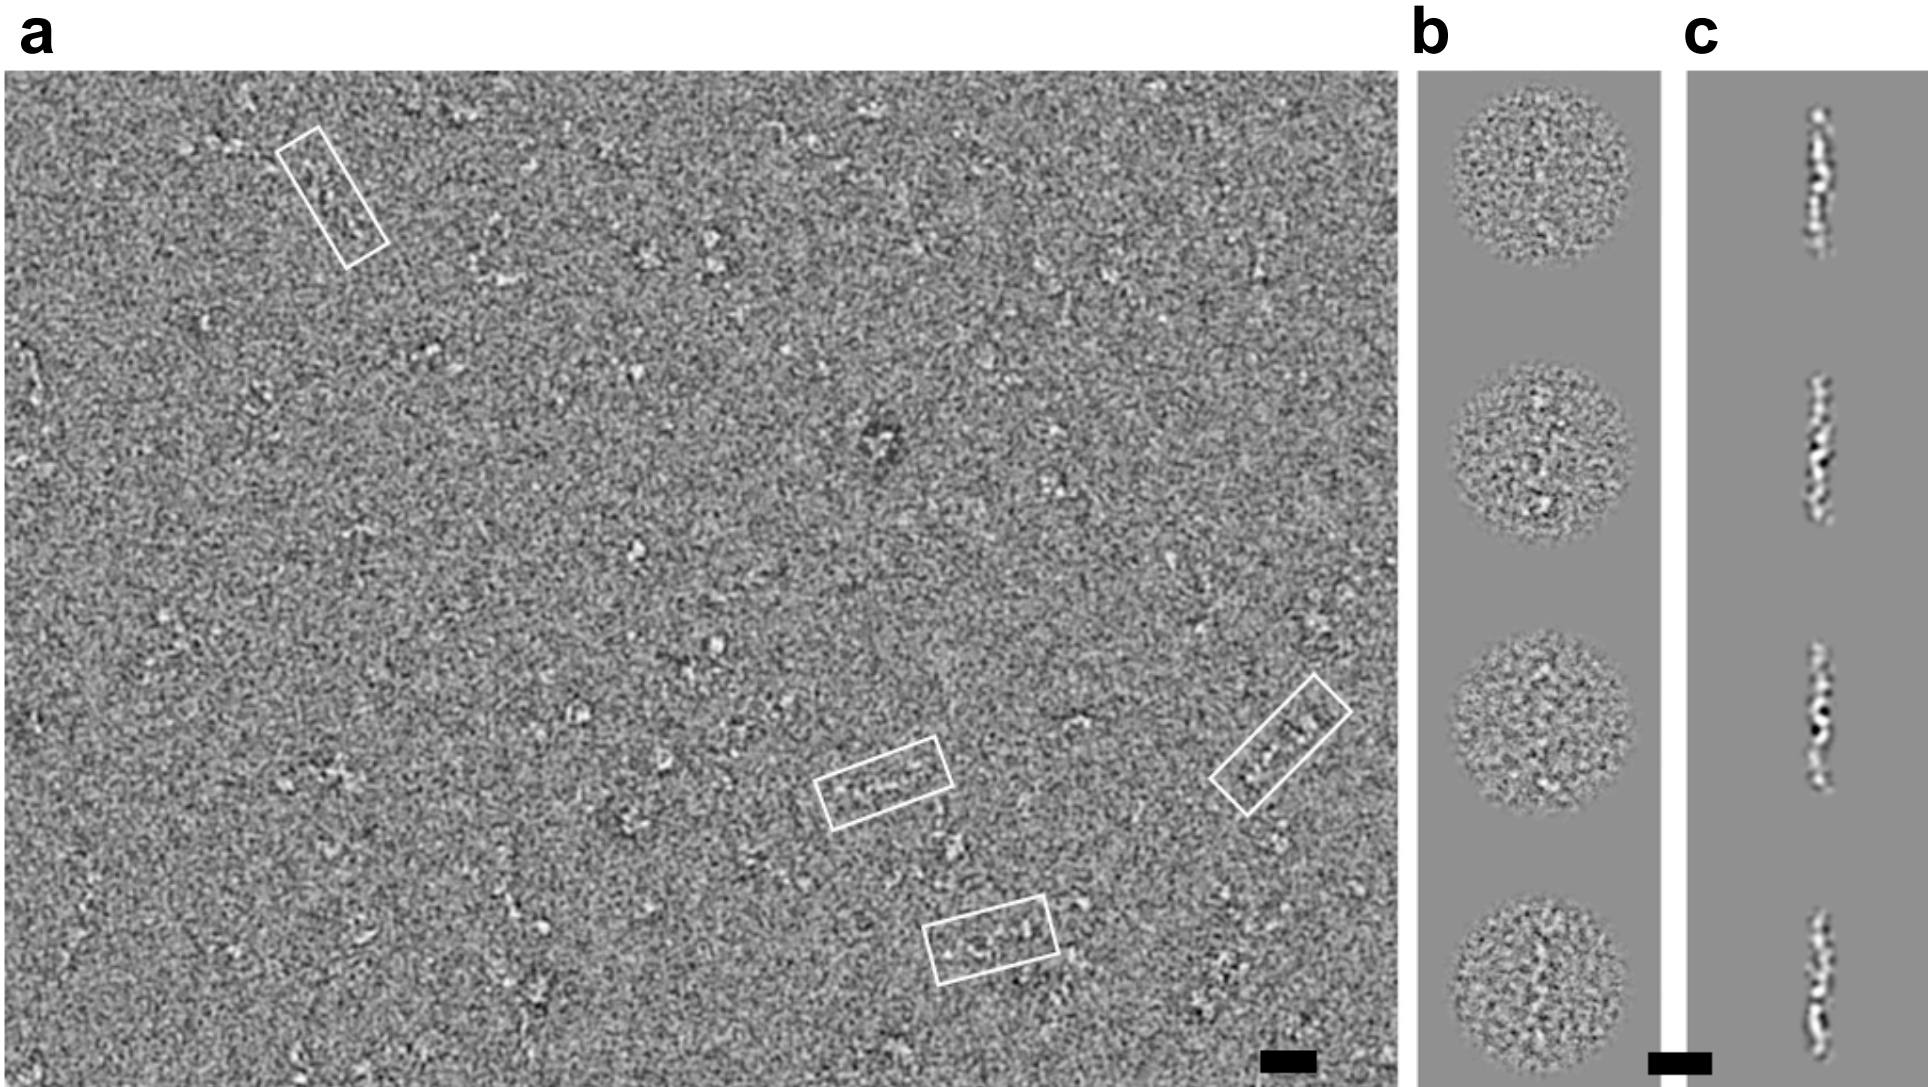

**Supplementary Figure 4**
